# Supplementary material
Source: publisher figshare collection journal article supplement (https://acs.figshare.com/ndownloader/files/5175643)
Supplement: Supplementary file 1 [file 5175643]

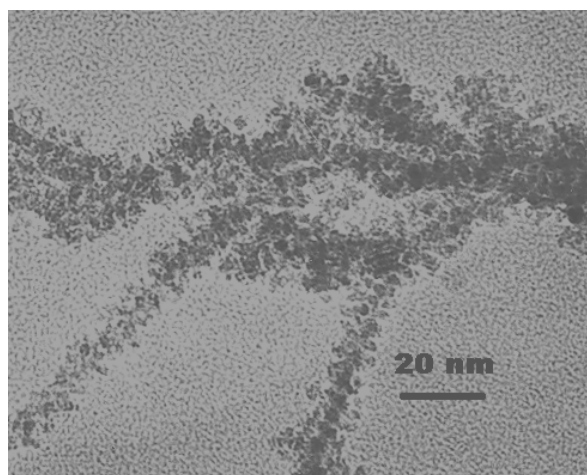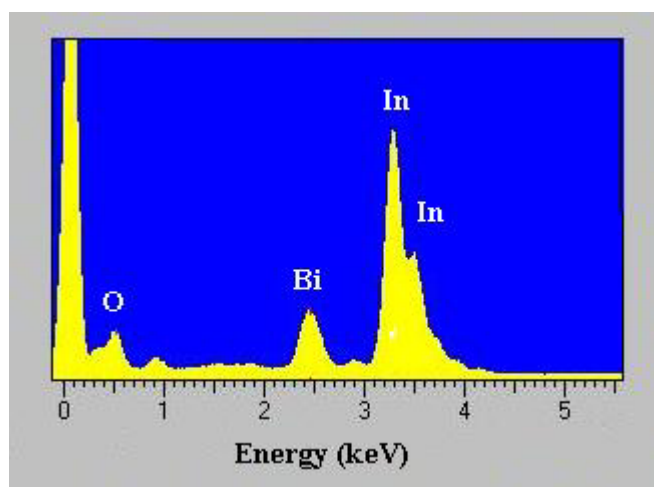

**Figure S1** TEM image (upper) and EDX spectrum (lower) of the oxidizing samples

TEM image shows that samples appear to be close to particle-like shape and the EDX spectrum indicates the co-existence of Bi, O and In in the sample, which suggests that  $\text{In}_2\text{O}_3$  might be present in particle form.
